# Supplementary material for: Implementing a State-Based Cardiovascular Disease and Diabetes Prevention Program
Source: PubMed Central journal article supplement — Diabetes Care. 2010 Aug 30;33(12):2543–5. doi: 10.2337/dc10-0862 (PMC2992185; doi:10.2337/dc10-0862), 2010-08-30
Supplement: supp_dc10-0862_dc100862onlineappendix.pdf [file supp_dc10-0862_dc100862onlineappendix.pdf]

## Appendix

The following persons were members of the Montana Cardiovascular Disease and Diabetes Prevention Program Workgroup.

***Community Medical Center, Missoula, Montana:*** Nancy R. Eyler, MD, FACP, Marjorie J. Samsøe, MA, CDE, , Shirley K. Schneiter, RD, CDE, Susan Schmidt, RD, Julie Bauer, MA.

***Holy Rosary Healthcare, Miles City, Montana:*** Darcy R. Kassner, BS, Carla McPherson, BS , Liane M. Vadheim, RD, LN, CDE, Tracy A. Vosler, MS, PT.

***Montana Department of Public Health and Human Services, Helena, Montana:*** Diane Arave, BS, Marcene K. Butcher, RD, CDE, Taryn O. Hall, MPH, Todd S. Harwell, MPH, and Steven D. Helgerson, MD, MPH, Mark L. Niebylski, PhD, MBA, MS, Karl K. Vanderwood, MPH.

***Saint Vincent Healthcare, Billings, Montana:*** Lane Guyse, MS, RD, LN, Charles R. McClave, II MD, Beverly McHugh RD, LN, CNSD, Jane Fitch Meszaros, RN, BSN, CDE, Justen Rudolph, MD.

***Saint Peters Hospital, Helena, Montana:*** Yvonne B. Tapper-Gardzina, MS, RD, Tolly J. Patten, RD, Leslie E. Foley, CPT, AFAA.

***Kalispell Regional Medical Center, Kalispell, Montana:*** Jennifer Janetski, MS RD CDE.

***Benefis Health System, Great Falls, Montana:*** Susan A. Garnic, RN, BSN, CDE, Deb K. Bjorsness MPH, RD, BC-ADM, CDE, Jeanette Butts, RD, Lindsay Smith, MS.

***Barrett Hospital and Healthcare, Dillon, Montana:*** Jill Pulaski, RD; Deanna Nelson, RN; and Sandra McIntyre MD.

***Billings Clinic, Billings Montana:*** Beth Wiome, MBA, RD, CDE, LN and Melissa Paulson, MS, RCEP.

**Table. Characteristics of participants completing the core and after core lifestyle intervention, Montana 2008-2010.**

|                                                   | All Enrolled<br>N=1003 | Completed core<br>N=816 | Completed after<br>core<br>N=578 |
|---------------------------------------------------|------------------------|-------------------------|----------------------------------|
| Age                                               | 52.3 +/- 11.6*         | 53.4 +/- 11.5*          | 54.6 +/- 10.6*                   |
| BMI                                               | 36.3 +/- 7.1           | 35.9 +/- 7.0*           | 35.1 +/- 6.6*                    |
| Female                                            | 80 (805/1001)          | 80 (651/816)            | 78 (452/576)                     |
| Diagnosed hypertension                            | 47 (450/967)           | 47 (374/793)            | 49 (275/560)                     |
| Elevated blood pressure <sup>†</sup> at<br>intake | 61 (576/943)           | 61 (473/771)            | 59 (319/542)                     |
| Diagnosed dyslipidemia                            | 44 (408/918)           | 46 (354/760)*           | 50 (271/538)*                    |
| Pre-diabetes/IGT/IFG                              | 53 (423/795)           | 54 (363/673)            | 54 (256/477)                     |
| History of gestational<br>diabetes                | 6 (50/797)             | 6 (37/609)              | 6 (28/448)                       |
| History of giving birth to a<br>baby $\geq$ 9 lbs | 16 (125/796)           | 16 (101/646)            | 18 (78/448)                      |

Data are % (n) or means +/- SD. \*P < 0.05. T-tests were used to calculate difference between means, and chi-square tests were used to calculate differences between proportions. <sup>†</sup>Systolic blood pressure > 130 mmHg and/or diastolic blood pressure > 85 mmHg.
